# Supplementary material
Source: Springer Nature journal article supplement (https://www.springermedizin.de/resource/supplementary/13054_2010_8456_MOESM2_ESM.pdf/9732006)

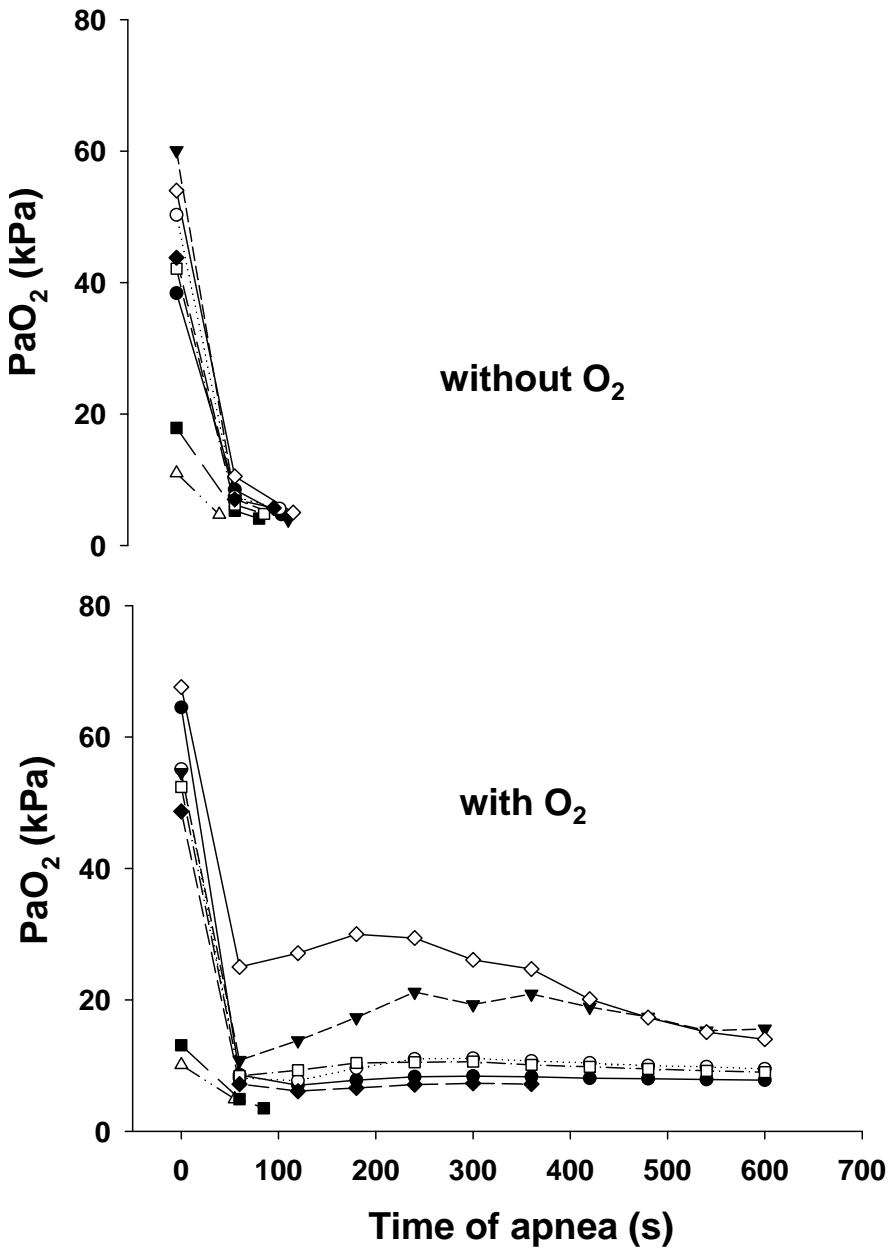

Supplement: MOESM2 [file 9732006]
